# Supplementary material for: Comment on “Transport of substantial stratospheric ozone to the surface by a dying typhoon and shallow convection” by Chen et al. (2022)
Source: Copernicus journal article supplement (doi:10.5194/acp-24-3759-2024), 2024-03-26
Supplement: Supplementary file 1 [file acp-24-3759-2024-supplement.pdf]

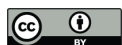

*Supplement of*

**Comment on “Transport of substantial stratospheric ozone to the surface by a dying typhoon and shallow convection” by Chen et al. (2022)**

**Xiangdong Zheng et al.**

*Correspondence to:* Xiaobin Xu ([xiaobin\\_xu@189.cn](mailto:xiaobin_xu@189.cn))

The copyright of individual parts of the supplement might differ from the article licence.

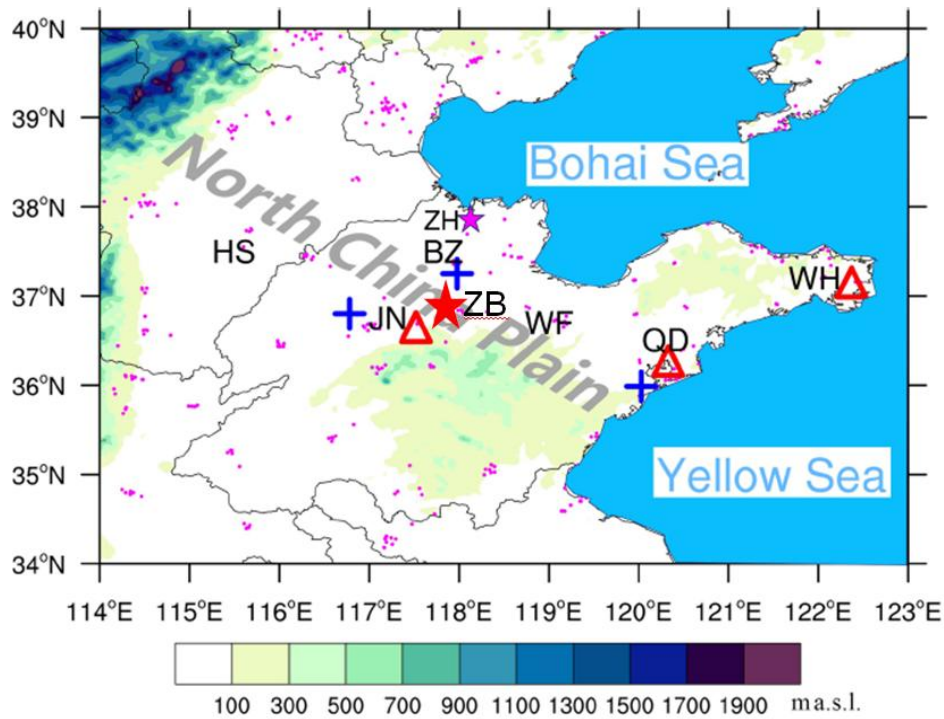

Figure S1: Map modified from Figure 1 in Chen et al. (2022) showing the NCP and its topography with locations of related cities Hengshui (HS), Jinan (JN), Binzhou (BZ), Weifang (WF), Qingdao (QD), Weihai (WH), and Zibo (ZB, red star, newly added in this study). ZB roughly occupies the area of 36.5 °-36.8 °N and 117.9 °-118.0 °E. Other details see Chen et al. (2022).

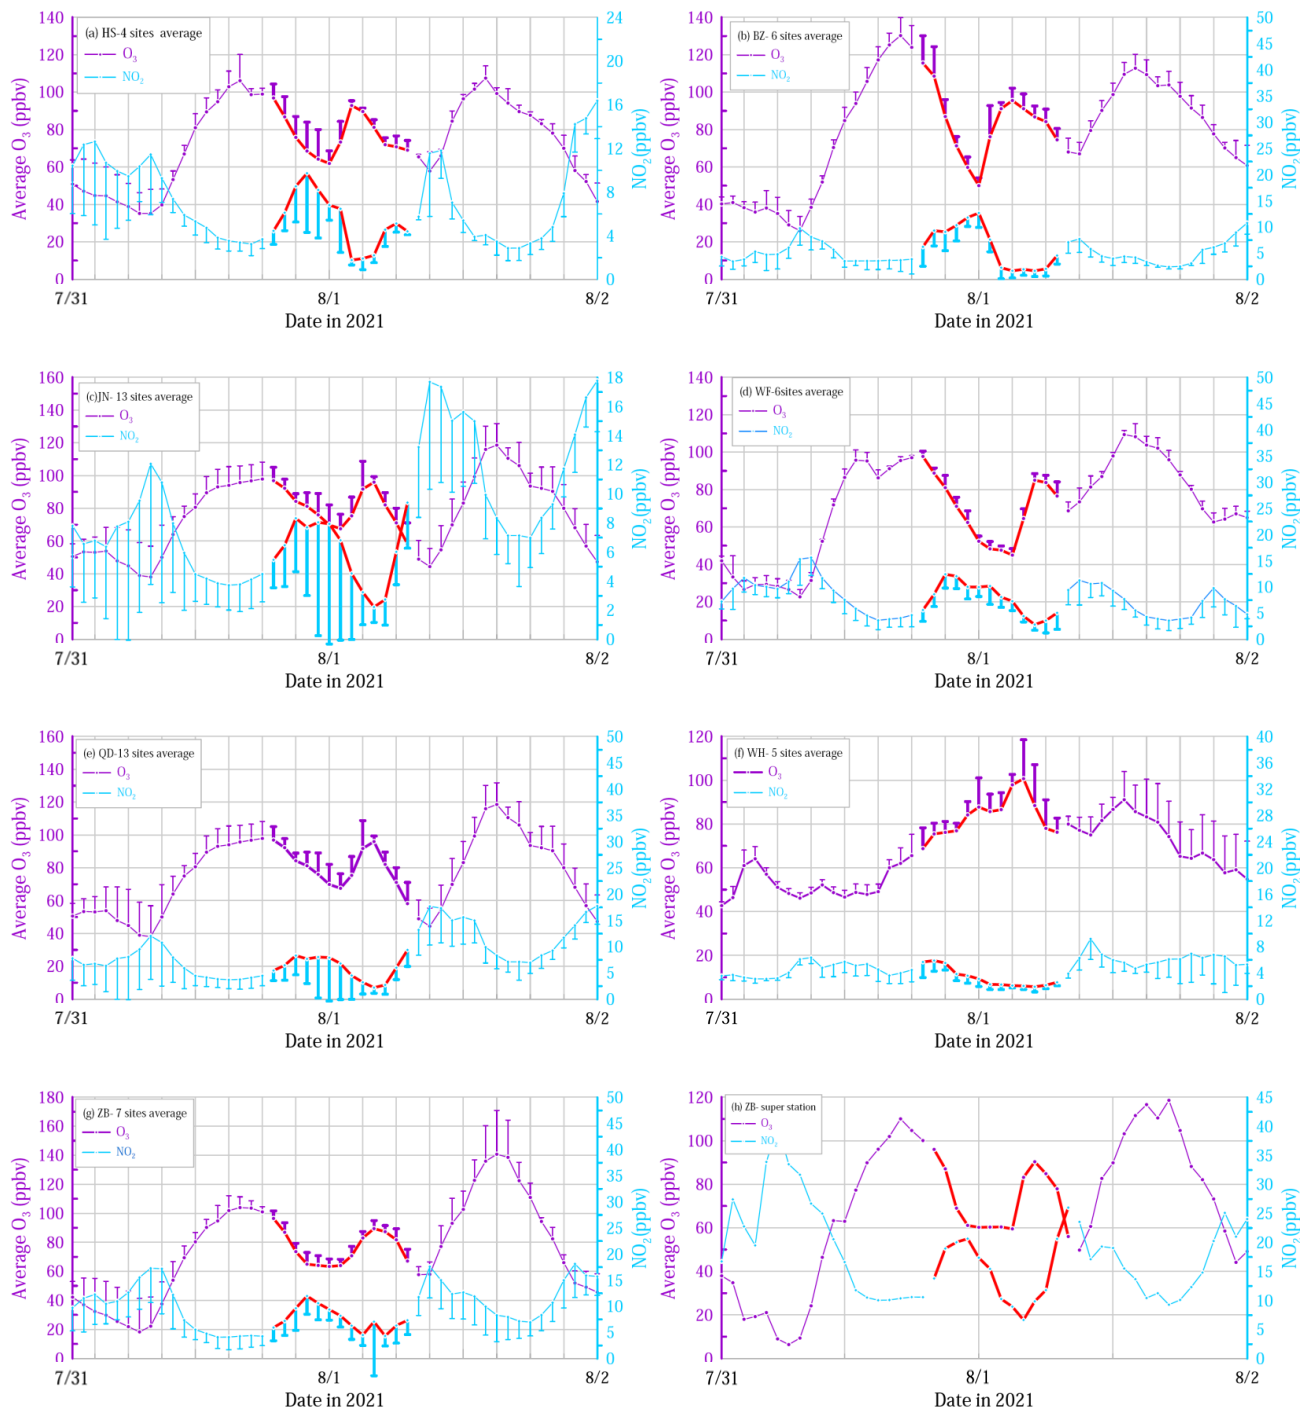

**Figure S2.** same as Figure 1 but showing only the period from 00:00 LT on 31 July to 23:00 LT on 1 August to highlight the NOEs. The error bars indicate 1 standard deviation of average  $O_3$  (up) and  $NO_2$  (down).

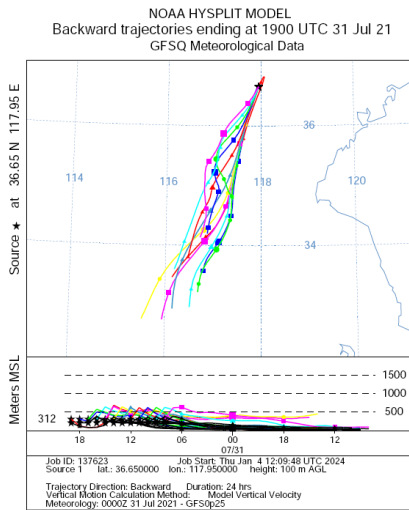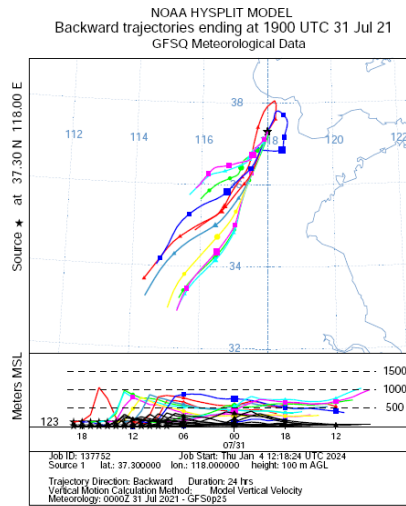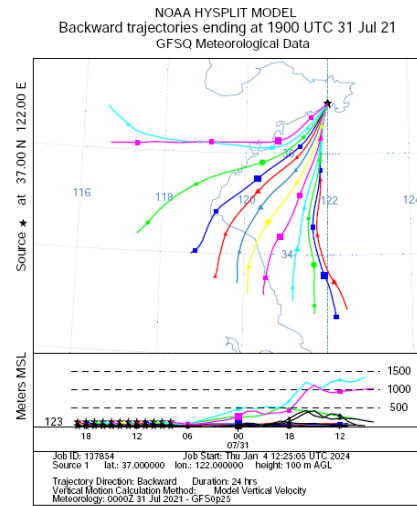

10 **Figure S3. Backward trajectories for air parcels arriving at 100 m above ground over Zibo (ZB, left), Binzhou (BZ, middle) and Weihai (WH, right) every hour between 19:00 and 08:00 UTC, 31 July 2021. The trajectories were computed online using the HYSPLIT model (<https://www.ready.noaa.gov/HYSPLIT.php>; Stein et al. 2015; Rolph et al., 2017) and the Global Forecast System (GFS) reanalysis data (0.25 ° resolution, [https://www.emc.ncep.noaa.gov/emc/pages/numerical\\_forecast\\_systems/gfs.php](https://www.emc.ncep.noaa.gov/emc/pages/numerical_forecast_systems/gfs.php)). The total run time for the trajectories was 24 hours.**

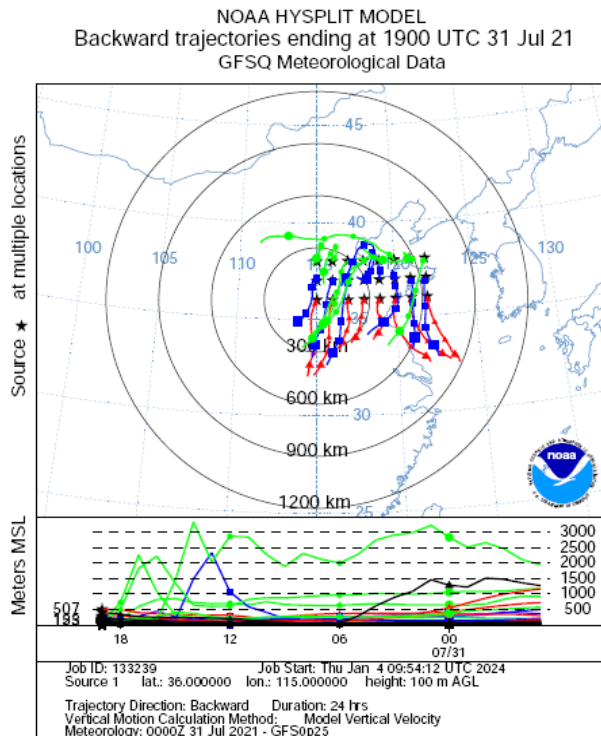

15 **Figure S4. Matrix of backward trajectories for air parcels arriving at 100 m above ground over the domain 36 °38' N and 115 ° 122' E at 19:00 UTC, 31 July 2021. The trajectories were computed online using the HYSPLIT model (<https://www.ready.noaa.gov/HYSPLIT.php>; Stein et al. 2015; Rolph et al., 2017) and the Global Forecast System (GFS) reanalysis data (0.25 ° resolution, [https://www.emc.ncep.noaa.gov/emc/pages/numerical\\_forecast\\_systems/gfs.php](https://www.emc.ncep.noaa.gov/emc/pages/numerical_forecast_systems/gfs.php)). The total run time for the trajectories was 24 hours.**

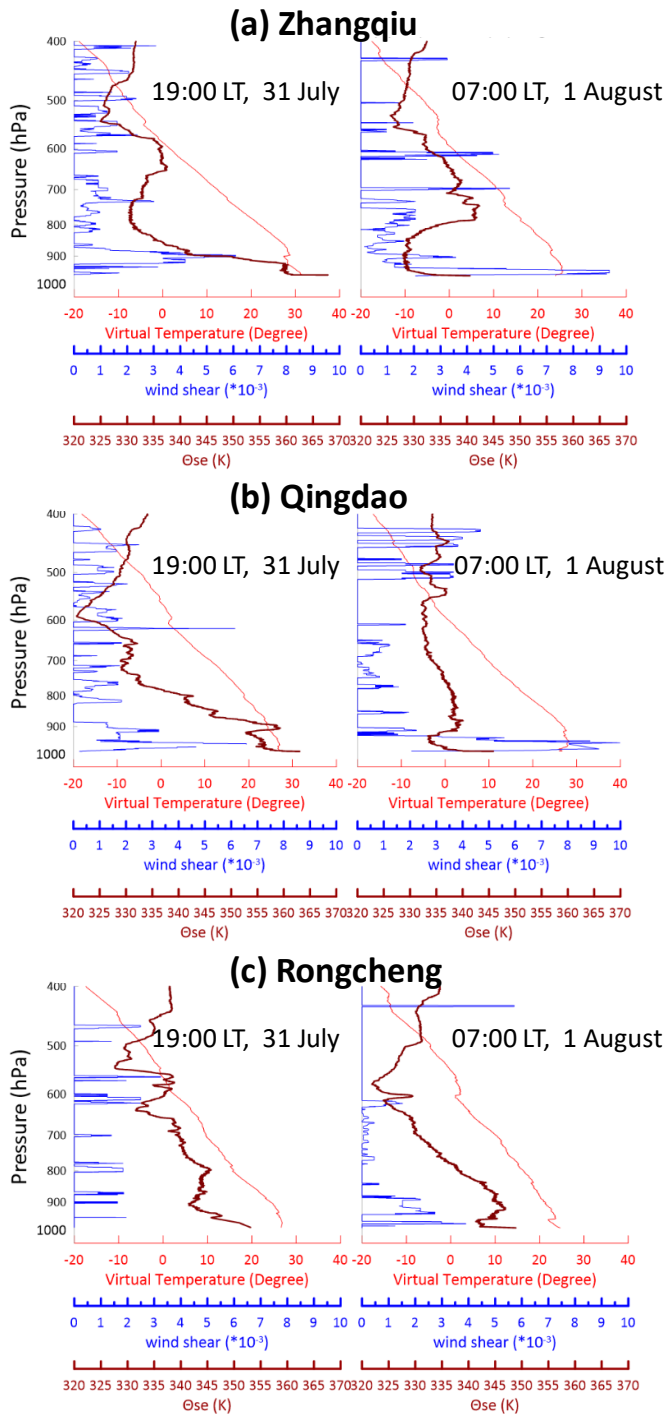

Figure S5. The vertical profiles of virtual temperature (red), equivalent potential temperature ( $\theta_{se}$ , grey) and wind shear (blue) calculated on the basis of routine radiosonde observations data at 19:00 LT on 31 July and 07:00 LT on 1 August 2021 in Zhangqiu (ZQ)(a), Qingdao (QD)(b) and Rongcheng (RC)(c).

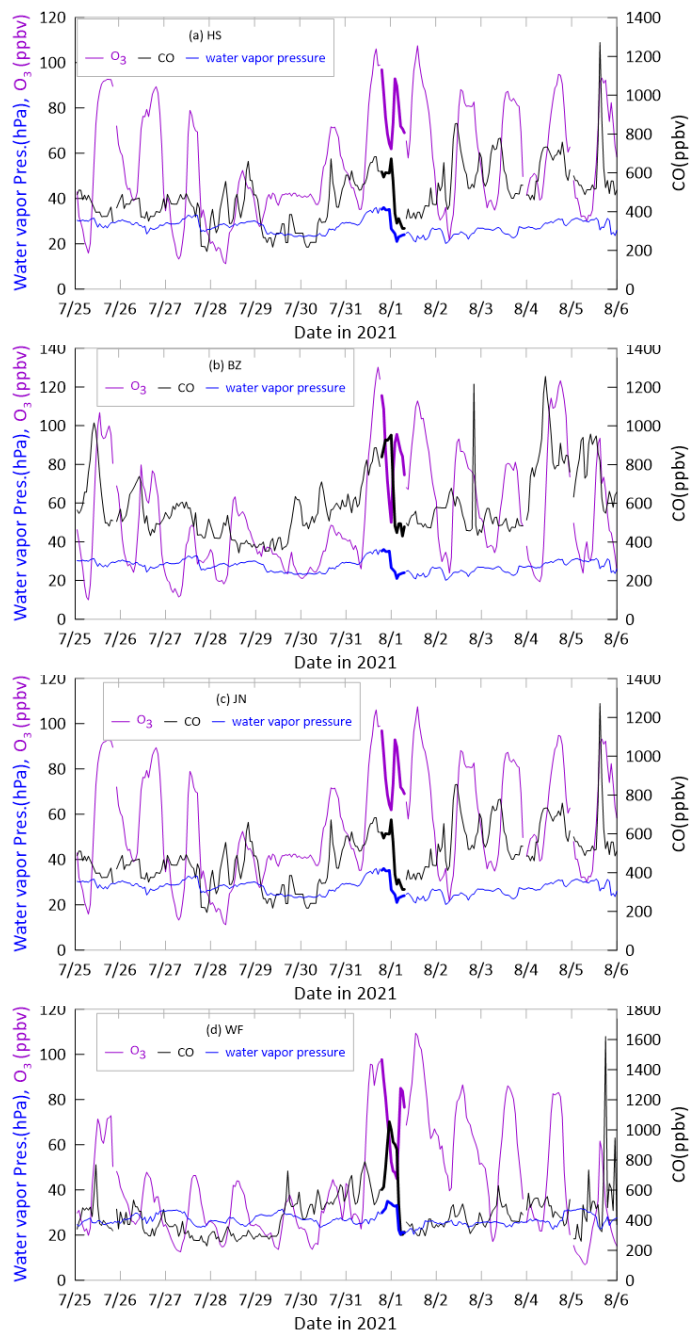

25 **Figure S6.** Time series of hourly multi-sites-averages of  $O_3$  (purple), CO (black ) and water vapor pressure (blue) between 25 July and 5 August 2021. Data from 18:00 LT on 31 July to 06:00 LT on 1 August are highlighted in thick lines. The multi-site data from HS (4 sites) (a), BZ (6 sites) (b), JN (13 sites)(c), WF (6 sites) (d), QD (13 sites) (e),WH (5 sites)(f) and ZB ( 7sites) (g) are available at <https://quotsoft.net/air> (last access: 15 April 2023; X. L. Wang, 2020). Data from the ZB supersite (h) is provided by the Chinese Academy of Environmental Sciences (CRAES). Water vapor pressure data are from <https://data.cma.cn/>.

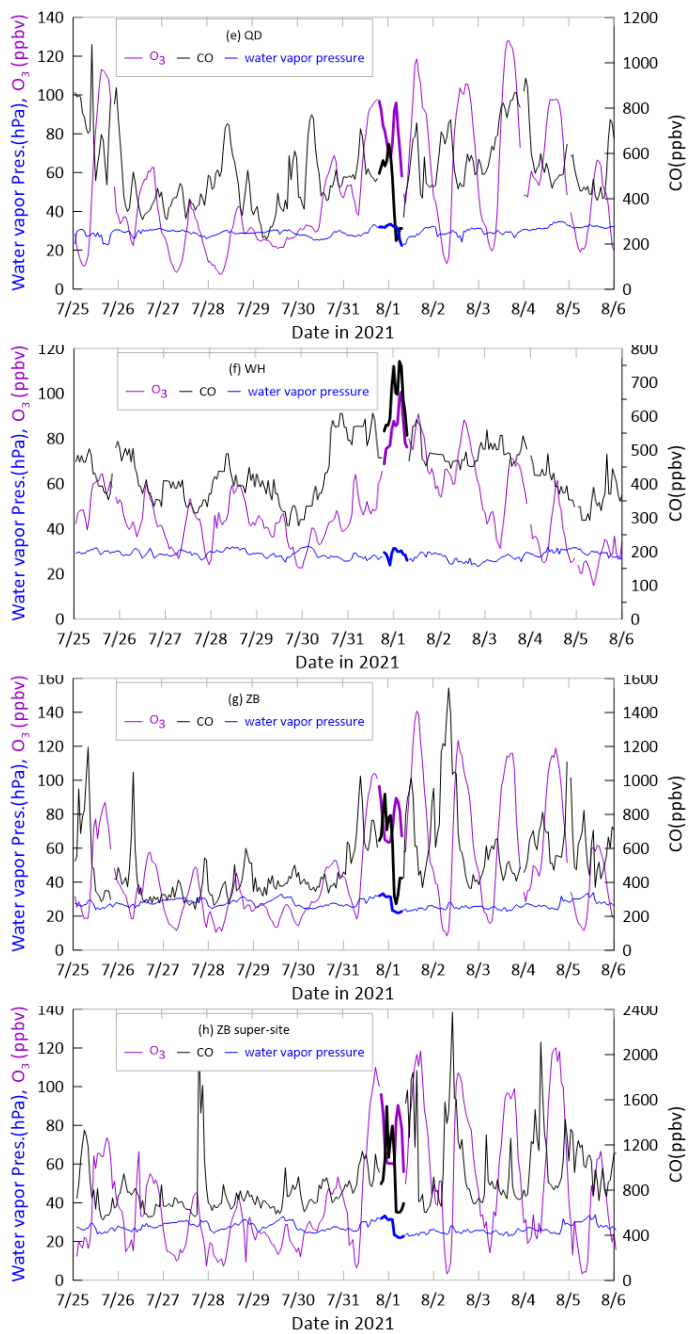

30

Figure S6. (continued).



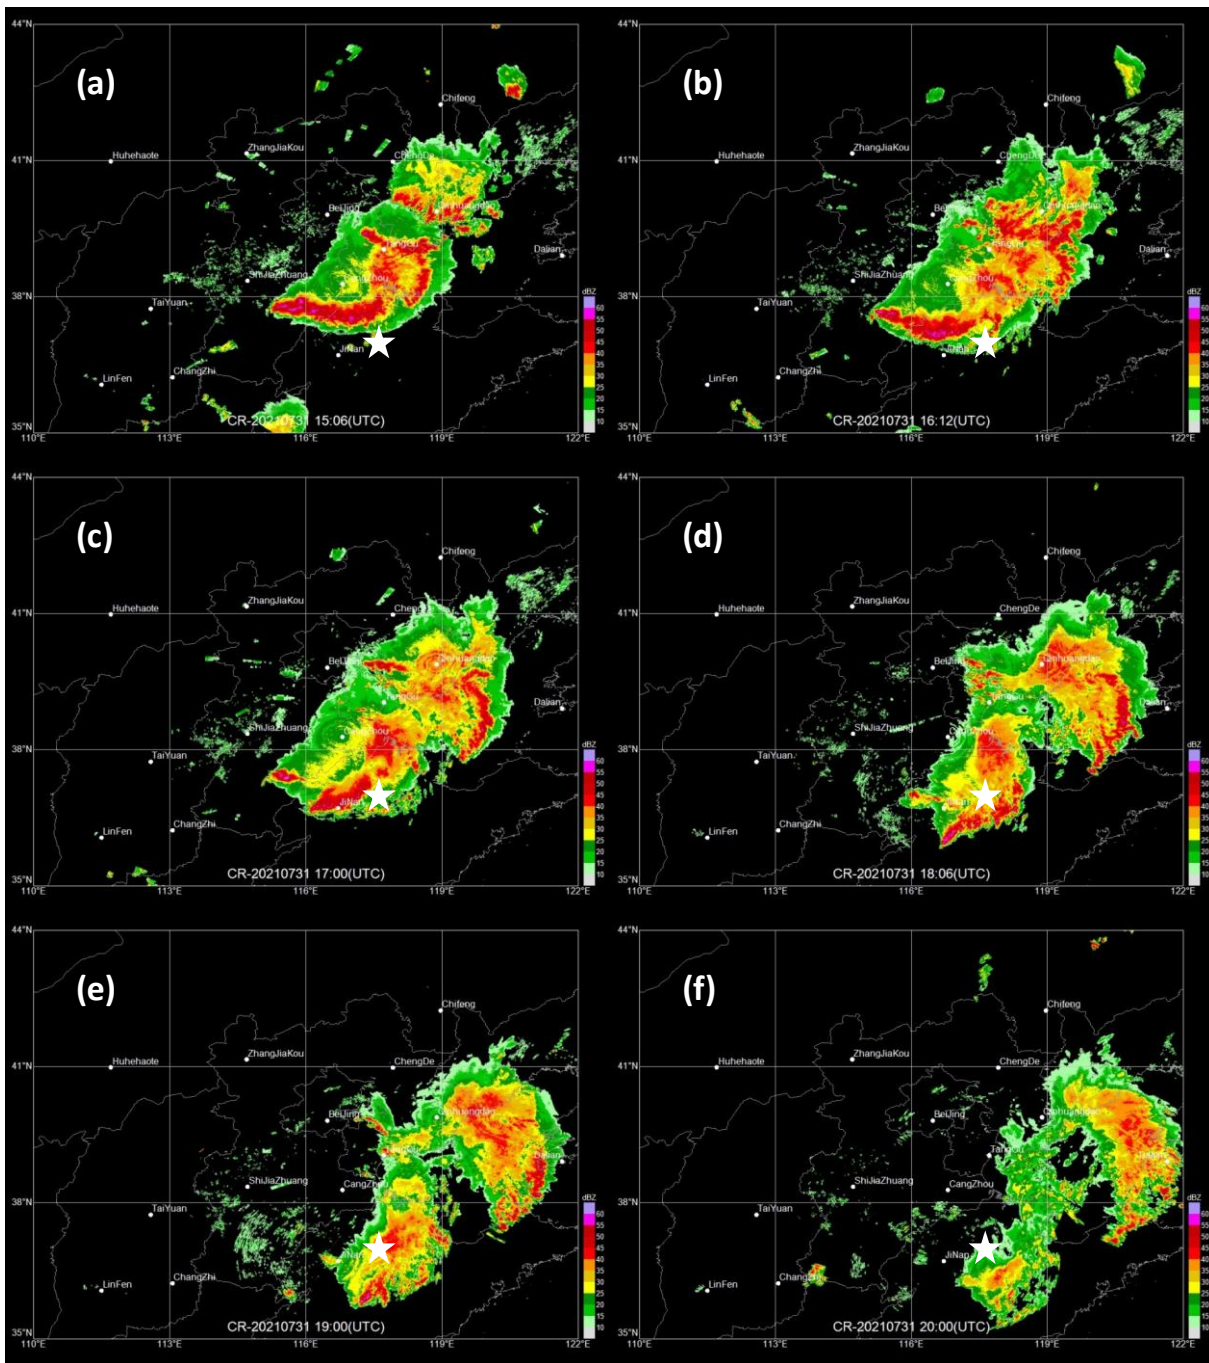

35 **Figure S7.** Radar reflectivity maps for the North China Plain at (a) 15:06 UTC (23:00 LT, 31 July), (b) 16:12 UTC (00:12 LT, 1 August), (c) 17:00 UTC (01:00 LT, 1 August), (d) 18:06 UTC (02:06 LT, 1 August), (e) 19:00 UTC (03:00 LT, 1 August) and (f) 20:00 UTC (04:00 LT, 1 August). Some of the major cities are indicated on the maps. The white star on each map shows the location of Zibo. The radar reflectivity maps were provided by Institute of Artificial Intelligence for Meteorology (IAIM), Chinese Academy of Meteorological Sciences (CAMS).



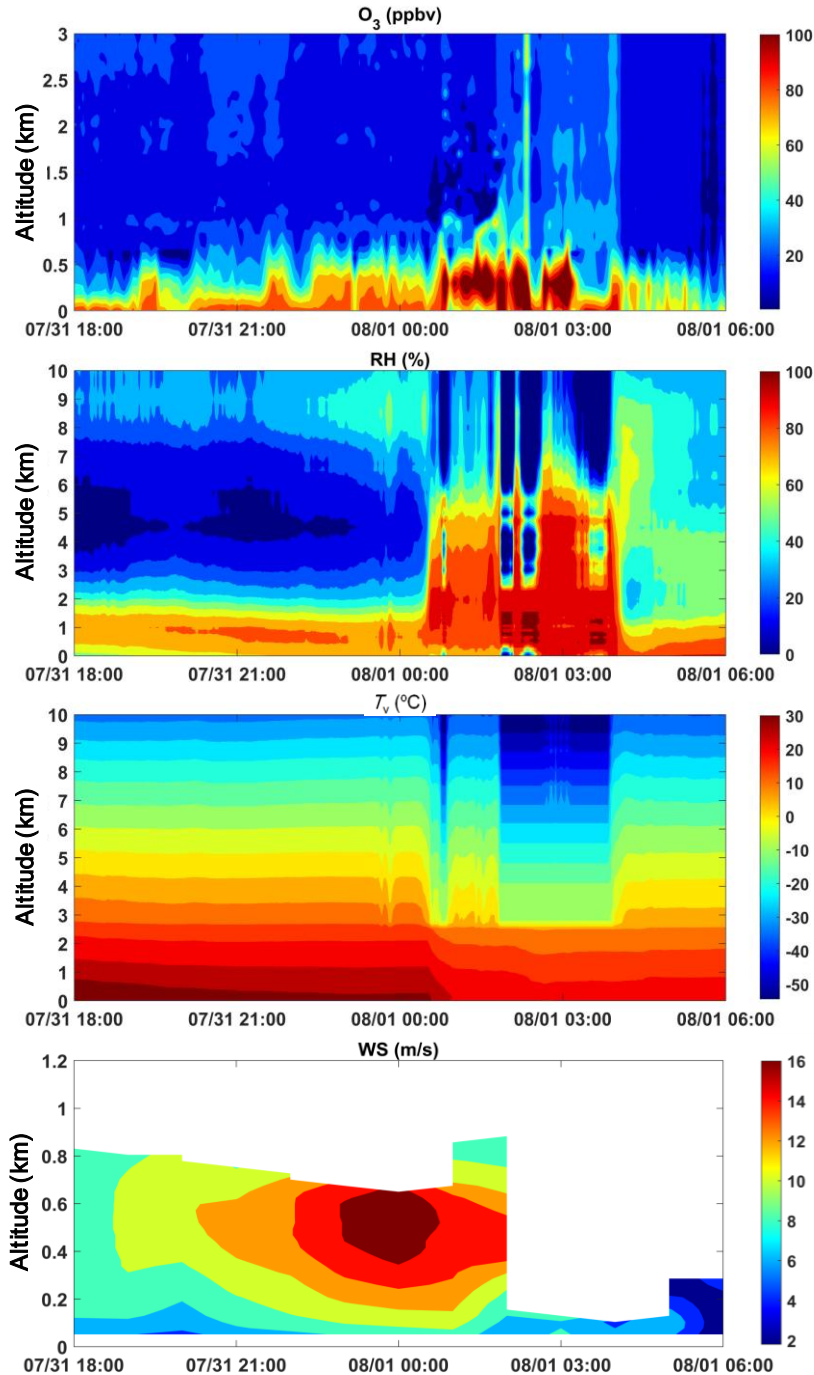

Figure S8. Time-altitude cross sections of O<sub>3</sub>, relative humidity (RH), virtual temperature ( $T_v$ ) and wind speed (WS) observed at the ZB supersite between 18:00 LT, 31 July and 06:00 LT, 1 August 2021. Vertical profiles of O<sub>3</sub> were obtained by a Lidar (RayOL-GB, Anhui Kechuang Zhongguang Technology Co., Ltd., China). Profiles of RH and  $T_v$  were detected by a microwave radiometer (KT-001, Qingdao Tianlang Environmental Technology Co., Ltd., China). Vertical distributions of WS were observed by a wind profiler radar (WindPrint V2000, Qingdao Huanhang Safety Environment Technology Co., Ltd, China).

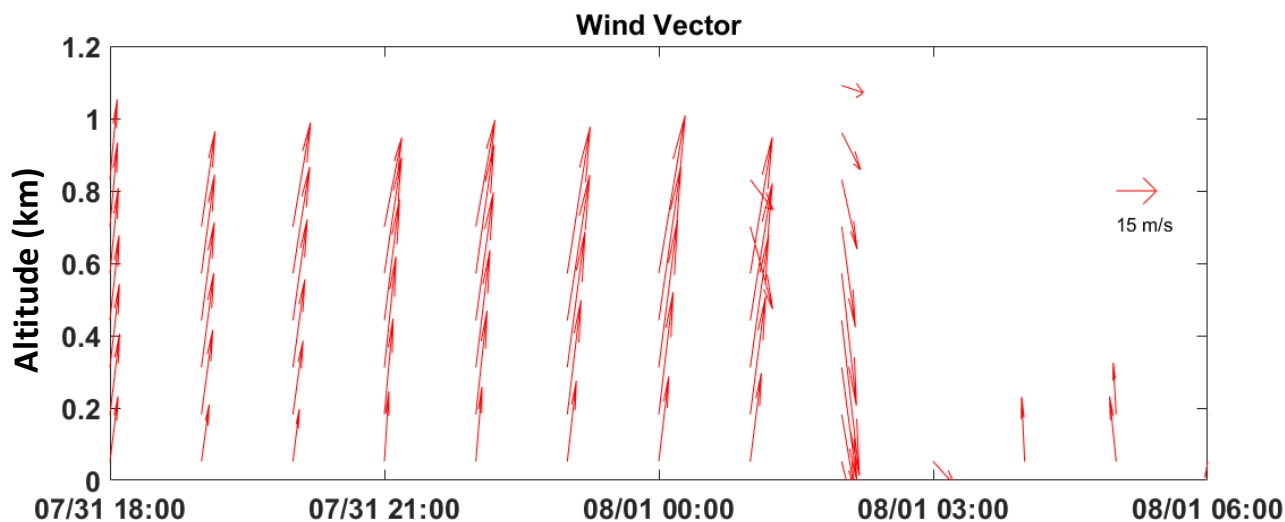

50 **Figure S9.** Hourly averaged wind vector below 1 km over the ZB supersite between 18:00 LT, 31 July and 06:00 LT, 1 August 2021. Wind data were observed by a wind profiler radar (WindPrint V2000, Qingdao Huanhang Safety Environment Technology Co., Ltd, China).

### Section S1 Identifying potential origin of the NOE by comparing afternoon $O_3$ with $O_x$ in the NBL during the NOE

Our intention is to check whether or not surface  $O_3$  observed during the NOE contained significant contribution of  $O_3$  from the stratosphere. For this purpose, a comparison of  $O_3$  levels in the vertical direction is helpful. However,  $O_3$  is very reactive and can be significantly removed by titration reactions in the boundary layer, with  $O_3 + NO = NO_2 + O_2$  being the most important one. Therefore,  $O_x$  ( $O_3+NO_2$ ) is a more conserved quantity than  $O_3$  and hence a better metric for comparison (Kley et al., 1994; Kleinmann et al., 2002; Caputi et al., 2019; He et al., 2022). During daytime,  $NO_2$  formed in the titration reaction is rapidly photolyzed to regenerate  $O_3$  so that the net chemical loss of  $O_3$  is relatively small. At night, however, the reaction between  $O_3$  and  $NO$  leads to lower levels of  $O_3$  in the nocturnal boundary layer (NBL) and in the residual layer (RL). Because the emission of  $NO$  takes place mainly in the NBL, much more  $O_3$  is removed by the titration reaction in the NBL than in the RL (Wang et al., 2018; Caputi et al., 2019; He et al., 2022). In addition,  $O_3$  in the NBL is subjected to dry deposition. Therefore, the  $O_3$  level before sunset largely remains in the RL (Caputi et al., 2019; He et al., 2022) and is usually much higher in the RL than in the NBL under normal conditions.

65 Following the method of He et al. (2022), we make comparison of afternoon  $O_3$  averages on 31 July with the respective  $O_x$  averages in the NBL during the NOE between 31 July and 1 August, 2021. To facilitate the comparison, we treat the average surface  $O_3$  during 14:00-17:00 LT of 31 July as afternoon average of  $O_3$  in the convective boundary layer, denoted as  $[O_3]_{\text{aft}}$ . Let us now focus on three nighttime atmospheric conditions, (I) undisturbed, (II) disturbed with NOE but no STT impact, and (III) disturbed with NOE and significant STT impact.

Under undisturbed condition (I), the nighttime average  $O_3$  concentration in the RL ( $[O_3]_{\text{RL}}$ ) should be close to (or only slightly lower than)  $[O_3]_{\text{aft}}$  (Caputi et al., 2019; He et al., 2022), while the average  $O_3$  concentration in the NBL ( $[O_3]_{\text{NBL}}$ )

70 should be much lower than  $[O_3]_{aft}$  due to the impacts of NO titration ( $\Delta[O_3]_{titr}$ ) and dry deposition ( $\Delta[O_3]_{dep}$ ), and the average  $O_x$  concentration in the NBL ( $[O_x]_{NBL}$ ) should also be lower than  $[O_3]_{aft}$  due to dry deposition. The following relationships should be tenable:

$$[O_3]_{RL} \leq [O_3]_{aft} \quad (S1)$$

$$[O_3]_{NBL} = [O_3]_{aft} - \Delta[O_3]_{titr} - \Delta[O_3]_{dep} \quad (S2)$$

75  $[O_x]_{NBL} = [O_3]_{aft} - \Delta[O_3]_{dep} \quad (S3)$

Under disturbed condition with NOE but no STT impact (II), a downward transport of  $O_3$  from the RL to NBL should be considered. Assuming that the downward transport causes a reduction of  $[O_3]_{RL}$  by  $\Delta[O_3]_{D1}$  and an increase of  $[O_3]_{NBL}$  by  $\Delta[O_3]_{D2}$ , then

$$[O_3]_{RL} \leq [O_3]_{aft} - \Delta[O_3]_{D1} \quad (S4)$$

80  $[O_3]_{NBL} = [O_3]_{aft} - \Delta[O_3]_{titr} - \Delta[O_3]_{dep} + \Delta[O_3]_{D2} \quad (S5)$

$$[O_x]_{NBL} = [O_3]_{aft} - \Delta[O_3]_{dep} + \Delta[O_3]_{D2} \quad (S6)$$

Under disturbed condition with NOE and STT impact (III), net contributions of  $O_3$  from the STT should be considered to the RL and the NBL. Assuming that the STT contribution increases  $[O_3]_{RL}$  and  $[O_3]_{NBL}$  by  $\Delta[O_3]_{STT1}$  and  $\Delta[O_3]_{STT2}$ , respectively, then

85  $[O_3]_{RL} \leq [O_3]_{aft} + \Delta[O_3]_{STT1} \quad (S7)$

$$[O_3]_{NBL} = [O_3]_{aft} - \Delta[O_3]_{titr} - \Delta[O_3]_{dep} + \Delta[O_3]_{STT2} \quad (S8)$$

$$[O_x]_{NBL} = [O_3]_{aft} - \Delta[O_3]_{dep} + \Delta[O_3]_{STT2} \quad (S9)$$

Equation (S3) indicates that  $[O_x]_{NBL}$  should be significantly lower than  $[O_3]_{aft}$  under undisturbed conditions. Although equation (S6) shows that  $[O_x]_{NBL}$  could be higher than  $[O_3]_{aft}$  (i.e., if  $\Delta[O_3]_{dep} < \Delta[O_3]_{D2}$ ), it cannot really occur because

90  $[O_3]_{RL} < [O_3]_{aft}$  (see equation (S4)) and  $O_3$  cannot be transported from a lower concentration position to the higher one. Therefore,  $[O_x]_{NBL}$  should not be significantly higher than  $[O_3]_{aft}$  under disturbed conditions with NOE but no STT impact. Dry deposition is only a small sink for nighttime surface  $O_3$  in northern China (Tang et al., 2017), while a STT impact could substantially enhanced the level of surface  $O_3$  if it reaches the surface layer. Hence, it is very likely according to equation (S9) that  $[O_x]_{NBL}$  is significantly higher than  $[O_3]_{aft}$  under disturbed condition with a STT impact. In summary,  $[O_x]_{NBL}$  should be

95 significantly higher than  $[O_3]_{aft}$  if the NBL is really impacted by stratospheric  $O_3$ , otherwise the STT impact is negligible even though a NOE event is observed.

## Section S2. Estimating photochemical ages of air masses arrived at the Zibo supersite

Once emitted into the atmosphere, all hydrocarbons experience decay caused mainly by the oxidation of OH radical and

100 atmospheric mixing (McKeen et al., 1990; Parrish et al., 1992). The relative compositions of hydrocarbons were used to study the histories of air masses over rural areas (Roberts et al., 1984) and remote marine areas (Rudolph et al., 1990). The so-called photochemical ages of air masses can be derived from observed ratios of hydrocarbons and OH mixing ratios either

measured or estimated. However, the calculated photochemical ages may be significantly impacted by atmospheric mixing on the ratios during transport (McKeen and Liu, 1993). Nevertheless, the estimation of photochemical age based on hydrocarbon ratios in air masses has been a current practice in atmospheric researches (e.g., Kleinman et al., 2003; Irei et al., 2016). Here, we follow the practice to estimate photochemical ages of air masses arrived at the Zibo (ZB) supersite during the NOE reported in Chen et al. (2022) and a few days before and after.

Hourly measurements of hydrocarbons at the supersite between 25 July and 5 August 2021 were used to calculate hydrocarbon ratios. Good correlations were found among some of the hydrocarbon ratios. Among the alkanes ratios, the best correlation existed between  $\text{Ln}(\text{Butane}/\text{Ethane})$  and  $\text{Ln}(\text{Propane}/\text{Ethane})$ , with  $R^2=0.63$  (Figure S10). Among the aromatics ratios, the best correlation existed between  $\text{Ln}(\text{o-Xylene}/\text{Benzene})$  and  $\text{Ln}(\text{Ethylbenzene}/\text{Benzene})$ , with  $R^2=0.89$  (Figure S11). In addition, there were also excellent correlations between  $\text{Ln}[\text{Butane}]$  and  $\text{Ln}[\text{Propane}]$  ( $R^2=0.78$ , Figure S12) and between  $\text{Ln}[\text{o-Xylene}]$  and  $\text{Ln}[\text{Ethylbenzene}]$  ( $R^2=0.85$ , Figure S13). These results indicate that ethane, propane and n-butane observed at the supersite were very likely from the same sources and so were benzene, ethylbenzene and o-Xylene. Therefore, it is proper to estimate photochemical ages using the ratios between these alkanes and aromatics. We derived photochemical ages from the ratios  $[\text{Butane}]/[\text{Propane}]$  and  $[\text{o-Xylene}]/[\text{Ethylbenzene}]$ .

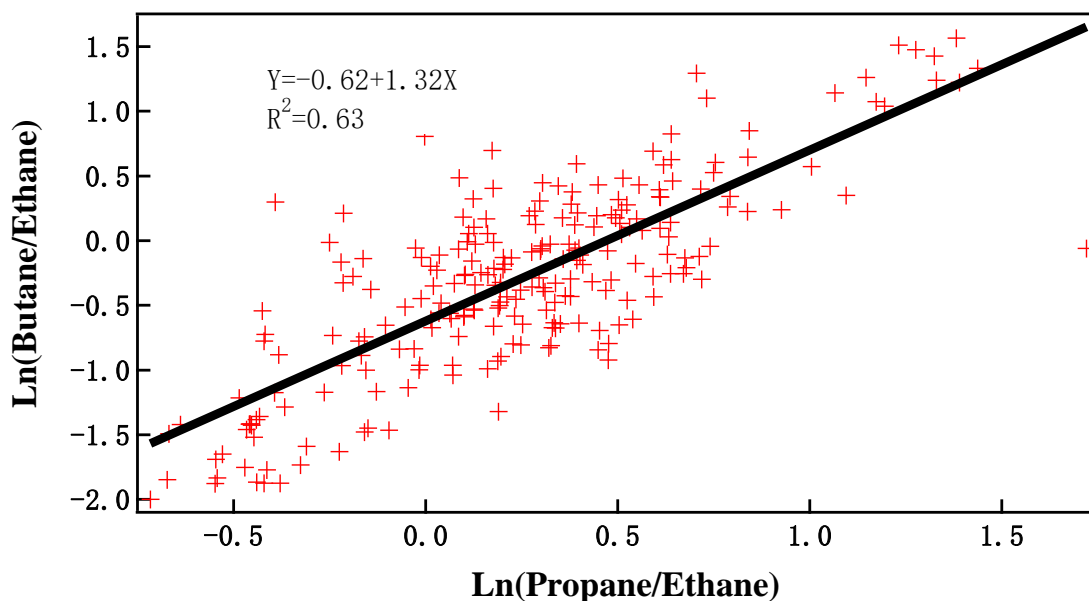

**Figure S10: Correlation between  $\text{Ln}(\text{Butane}/\text{Ethane})$  and  $\text{Ln}(\text{Propane}/\text{Ethane})$ .**

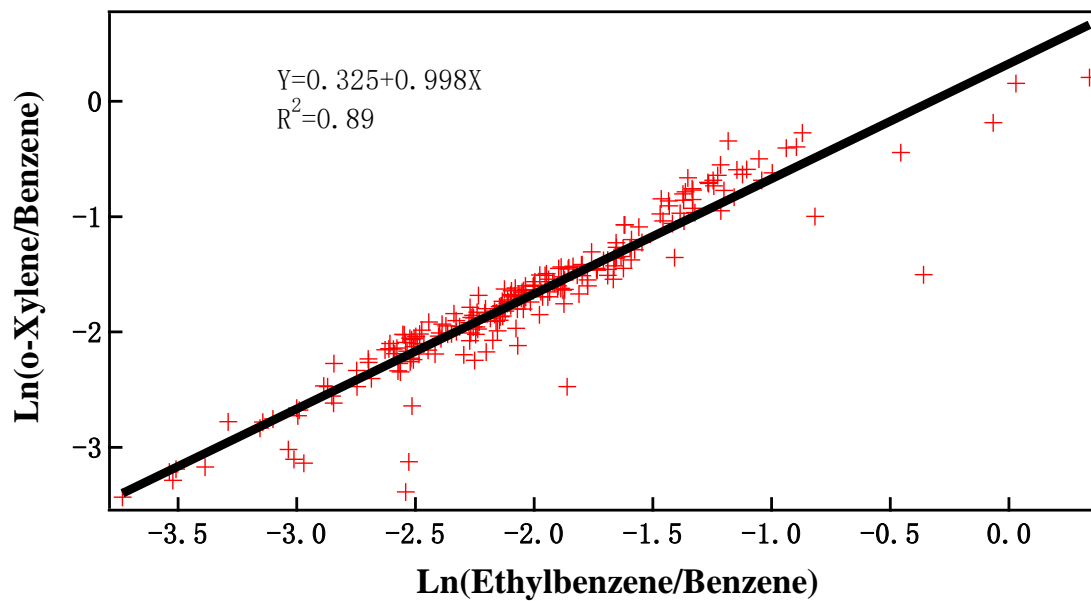

120

Figure S11: Correlation between Ln(o-Xylene/Benzene) and Ln(Ethylbenzene/Benzene).

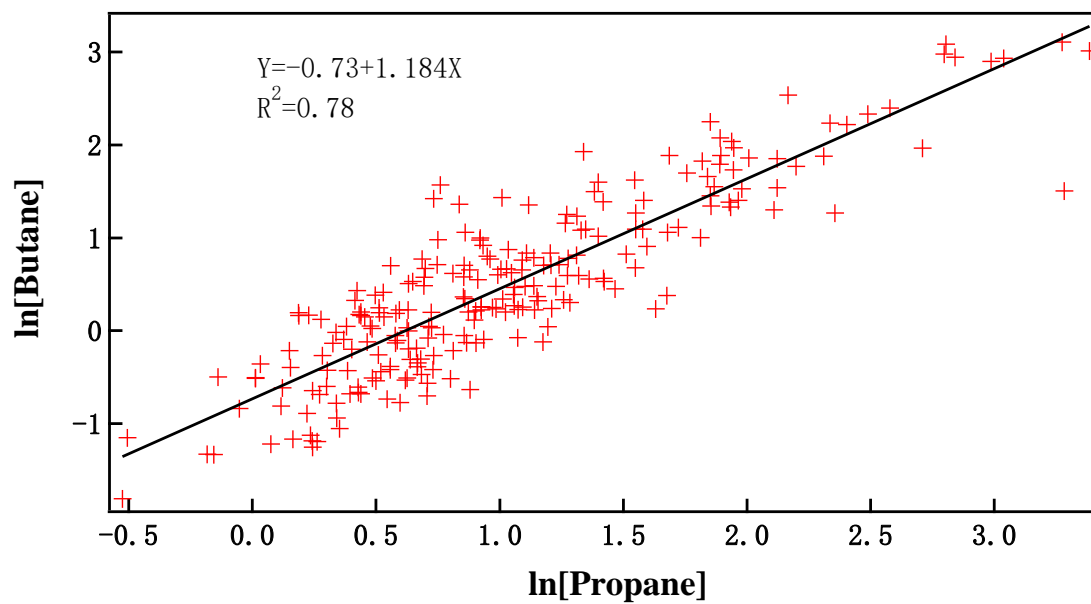

Figure S12: Correlation between butane and propane concentrations.

125

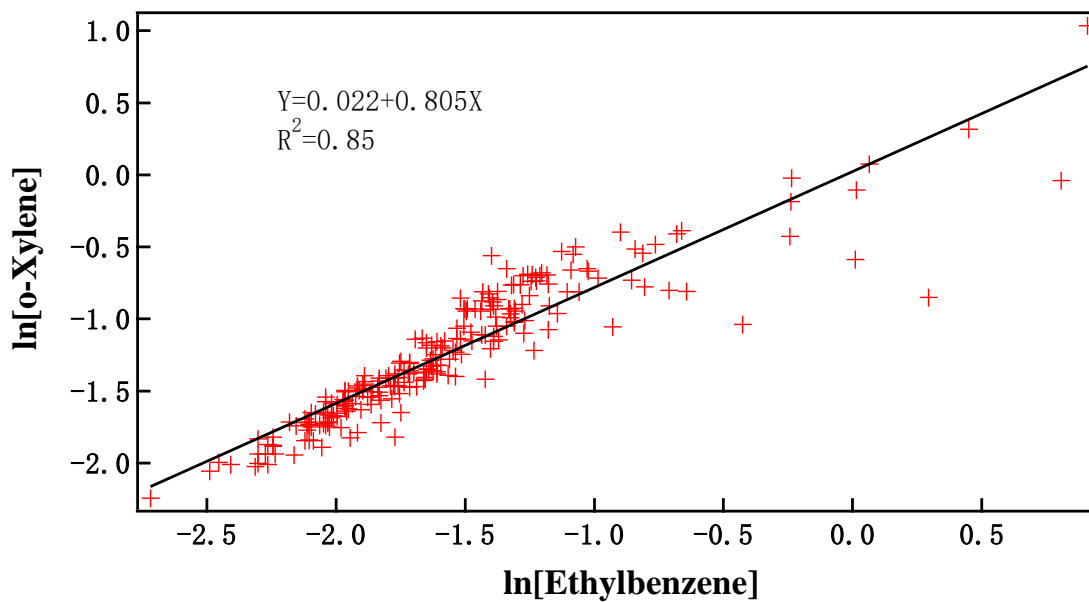

Figure S13: Correlation between o-xylenen and ethylbenzene concentrations.

Since the concentration of hydrocarbon X is enhanced by emissions and lowered by reaction with OH and mixing with background air, the change of the X concentration with time can be generally expressed as:

$$\frac{d[X]}{dt} = S_x - k_x[OH][X], \quad (S10)$$

where, [X] is the concentration of X;  $S_x$  represents collective impact on [X] of physical processes such as emissions, dilution, etc.; [OH] indicates the OH concentration averaged over the transport way;  $k_x$  is the rate constant for the X+OH reaction.

Similar expression can be given for hydrocarbon Y:

$$\frac{d[Y]}{dt} = S_y - k_y[OH][Y]. \quad (S11)$$

In Eq. S10 and Eq. S11,  $S_x$  and  $S_y$  are unknown and difficult to obtain. However, their impacts on hydrocarbon concentrations are assumed to be low if the hydrocarbons are relatively reactive. After ignoring  $S_x$  and  $S_y$  in Eq. S10 and Eq. S11, the following equations can be obtained by integration from time 0 to t:

$$\ln [X] = \ln[X_0] - k_x[OH]t \quad (S12)$$

and

$$\ln [Y] = \ln[Y_0] - k_y[OH]t, \quad (S13)$$

with  $X_0$  and  $Y_0$  being the respective concentrations of X and Y initial after emissions.

Finally, a formula for calculating photochemical ages can be derived from Eq.S12 and Eq. S13:

$$t = \frac{1}{(k_y - k_x)[OH]} \cdot \left( \ln \frac{[Y_0]}{[X_0]} - \ln \frac{[Y]}{[X]} \right). \quad (S14)$$

145 Rate constants ( $k_x$  and  $k_y$ ) are available in literature. Table S1. lists the rate constants at 298K for the reactions of OH with n-butane, propane, ethylbenzene and o-xylene. These rate constants were used in the estimation of photochemical ages without considering the influences of atmospheric conditions.

**Table S1: Rate constants of the reactions of the OH radical with some hydrocarbons at 298K**

| Reaction          | Rate constant, $\text{cm}^3/\text{mol/s}$ | Reference              |
|-------------------|-------------------------------------------|------------------------|
| n-butane + OH     | $1.45 \times 10^{12}$                     | Talukdar et al. (1994) |
| Propane + OH      | $6.58 \times 10^{11}$                     | DeMore et al. (1997)   |
| ethylbenzene + OH | $4.52 \times 10^{12}$                     | Atkinson (1986)        |
| o-xylene + OH     | $8.85 \times 10^{12}$                     | Atkinson (1986)        |

150 There was no observation of OH radical over ZB and surroundings. An assumption had to be made for the value of [OH] in Eq. S14. A recent study shows that the diel-average tropospheric column mean OH concentrations over the Yellow Sea and East China Sea areas were in the range of  $(1.5\text{-}3) \times 10^6$  molecules/ $\text{cm}^3$  during July-August 2016 (Thompson et al., 2022). In-situ observations of vertical profiles of OH showed that the OH mixing ratio for 29 April 1994 varied roughly in the range of 0.2-0.4 pptv (about  $(5\text{-}10) \times 10^6$  molecules/ $\text{cm}^3$ ) at the altitudes from 1 km to 12 km over Oklahoma, USA, with no  
155 consistent gradients (Brune et al., 1998). Ground measurements in summer of 2014 at Wangdu, a rural site in the North China Plain, showed median values of OH varying from  $5 \times 10^5$  molecules/ $\text{cm}^3$  at night to  $6.8 \times 10^6$  molecules/ $\text{cm}^3$  during 12:00-16:00 LT (Tan et al., 2017). Earlier observations made in August 2006 at Yufa, a suburban site in Beijing, showed the OH level varying from  $6 \times 10^5$  molecules/ $\text{cm}^3$  (detection limit) at night to  $(4\text{-}17) \times 10^6$  molecules/ $\text{cm}^3$  around noontime (Lu et al., 2013). Given these data of OH values, we assumed the average value of OH over ZB and surroundings for the period in  
160 consideration (i.e., 25 July - 5 August 2021) to be  $5 \times 10^6$  molecules/ $\text{cm}^3$ .

To obtain a better estimate of the range of photochemical ages, we calculated photochemical ages using both [Butane]/[Propane] and [o-Xylene]/[Ethylbenzene]. The initial values of [Butane]/[Propane] and [o-Xylene]/[Ethylbenzene] were not available. Therefore, we substituted the maximum [Butane]/[Propane] (2.25) and [o-Xylene]/[Ethylbenzene] (2.31) for the initial values of [Butane]/[Propane] and [o-Xylene]/[Ethylbenzene], respectively. These maximum ratios should be  
165 lower than the initial ones because they represented ratios certain time after the hydrocarbons were emitted. This may more or less underestimate photochemical ages but does not change our conclusion.

The photochemical ages of air masses arrived at the ZB supersite during 25 July – 5 August 2021 were calculated using Eq. S14, and based on [Butane]/[Propane] and [o-Xylene]/[Ethylbenzene], respectively. The two sets of estimated photochemical ages are shown in Figure 3, together with the observed  $\text{O}_3$  data.

170



## References

- Atkinson, R.: Kinetics and mechanisms of the gas-phase reactions of the hydroxyl radical with organic compounds under atmospheric conditions, *Chem. Rev.*, 86, 69,1986.
- 175 Brune, W.H., Faloona, I.C., Tan, D., Weinheimer, A.J., Campos, T., Ridley, B.A., Vay, S.A., Collins, J.E., Sachse, G.W., Jaegle, L., and Jacob, D.J.: Airborne in-situ OH and HO<sub>2</sub> observations in the cloud-free troposphere and lower stratosphere during SUCCESS, *Geophys. Res. Lett.*, 25(10), 1701-1704, 1998.
- Caputi, D.J., Faloona, I., Trousdell, J., Smoot, J., Falk, N., and Conley, S.: Residual layer ozone, mixing, and the nocturnal jet in California's San Joaquin Valley, *Atmos. Chem. Phys.*, 19, 4721–4740, <https://doi.org/10.5194/acp-19-4721-2019>, 2019.
- 180 Chen, Z., Liu, J., Qie, X., Cheng, X., Shen, Y., Yang, M., Jiang, R., and Liu., X.: Transport of substantial stratospheric ozone to the surface by a dying typhoon and shallow convection, *Atmos. Chem. Phys.*, 22, 8221–8240, <https://doi.org/10.5194/acp-22-8221-2022>, 2022.
- 185 DeMore, W.B., Sander, S.P., Golden, D.M., Hampson, R.F., Kurylo, M.J., Howard, C.J., Ravishankara, A.R., Kolb, C.E., and Molina, M.J.: Chemical kinetics and photochemical data for use in stratospheric modeling. Evaluation number 12, JPL Publication, 97-4 , 1-266, 1997.
- He, C., Lu, X., Wang, H., Wang, H., Li, Y., He, G., He, Y., Wang, Y., Zhang, Y., Liu, Y., Fan, Q., and Fan, S.: The unexpected high frequency of nocturnal surface ozone enhancement events over China: characteristics and mechanisms, *Atmos. Chem. Phys.*, 22, 15243–15261, <https://doi.org/10.5194/acp-22-15243-2022>, 2022.
- 190 Irei, S., Takami, A., Sadanaga, Y., Nozoe, S., Yonemura, S., Bandow, H., and Yokouchi, Y.: Photochemical age of air pollutants, ozone, and secondary organic aerosol in transboundary air observed on Fukue Island, Nagasaki, Japan, *Atmos. Chem. Phys.*, 16, 4555–4568, <https://doi.org/10.5194/acp-16-4555-2016>, 2016.
- Kleinman, L.I., Daum, P.H., Lee, Y.-N., Nunnermacher, L.J., Springston, S.R., Weinstein-Lloyd J., Hyde, P., Doskey, P., Rudolph, J., Fst, J., and Berkowitz, C.: Photochemical age determinations in the Phoenix metropolitan area, *J. Geophys. Res.*, 108(D3), 4096, doi:10.1029/2002JD002621, 2003.
- 195 Lu, K. D., Hofzumahaus, A., Holland, F., Bohn, B., Brauers, T., Fuchs, H., Hu, M., Häseler, R., Kita, K., Kondo, Y., Li, X., Lou, S. R., Oebel, A., Shao, M., Zeng, L. M., Wahner, A., Zhu, T., Zhang, Y. H., and Rohrer, F.: Missing OH source in a suburban environment near Beijing: observed and modelled OH and HO<sub>2</sub> concentrations in summer 2006, *Atmos. Chem. Phys.*, 13, 1057–1080, <https://doi.org/10.5194/acp-13-1057-2013>, 2013.
- 200 McKeen, S.A., and Liu, S.C.: Hydrocarbon ratios and photochemical history of air masses, *Geophys. Res. Lett.*, 20, 2363-2366, 1993.
- McKeen, S.A., Trainer, M, E.Y. Hsie, R.K. Tallamraju, and S.C.Liu, On the indirect determination of atmospheric OH radical concentrations from reactive hydrocarbon measurements, *J. Geophys. Res.*, 95, 7493-7500, 1990.

- 205 Parrish, D.D., Hahn, C.J., Williams, E.J., Norton, R.B., Fehsenfeld, F.C., Singh, H.B., Shetter, J.D., Gandrun, B.W., and Ridley, B.A.: Indications of photochemical histories of pacific air masses from measurements of atmospheric trace species at Point Arena, California, *J. Geophys. Res.*, **97**, 15883-15902, 1992.
- Rolph, G., Stein, A., and Stunder, B.: Real-time Environmental Applications and Display sYstem: READY. *Environmental Modelling & Software*, **95**, 210-228, <https://doi.org/10.1016/j.envsoft.2017.06.025>, 2017.
- 210 Roberts, J.M., Fehsenfeld, F.C., Liu, S.C., Bollinger, M.J., Hahn, C., Albritton, D.L., and Sievers, R.E.: Measurements of aromatic hydrocarbon ratios and NO<sub>x</sub> concentrations in the rural troposphere: Observation of air mass photochemical aging and NO<sub>x</sub> removal, *Atmos. Environ.*, **18**, 2421-2432, 1984.
- Rudolph, J., and Johnen, F.J.: Measurements of light atmospheric hydrocarbons over the Atlantic in regions of low biological activity, *J. Geophys. Res.*, **95**, 20583-20591, 1990.
- 215 Stein, A.F., Draxler, R.R., Rolph, G.D., Stunder, B.J.B., Cohen, M.D., and Ngan, F.: NOAA's HYSPLIT atmospheric transport and dispersion modeling system, *Bull. Amer. Meteor. Soc.*, **96**, 2059-2077, <http://dx.doi.org/10.1175/BAMS-D-14-00110.1>, 2015.
- Talukdar, R.K., Melouki, A., Gierczak, T., Barone, S., Chiang, S.-Y., and Ravishankara, A.R.: Kinetics of the reactions of OH with alkanes, *Int. J. Chem. Kinet.*, **26**, 973-990, 1994.
- 220 Tan, Z., Fuchs, H., Lu, K., Hofzumahaus, A., Bohn, B., Broch, S., Dong, H., Gomm, S., H äseler, R., He, L., Holland, F., Li, X., Liu, Y., Lu, S., Rohrer, F., Shao, M., Wang, B., Wang, M., Wu, Y., Zeng, L., Zhang, Y., Wahner, A., and Zhang, Y.: Radical chemistry at a rural site (Wangdu) in the North China Plain: observation and model calculations of OH, HO<sub>2</sub> and RO<sub>2</sub> radicals, *Atmos. Chem. Phys.*, **17**, 663–690, <https://doi.org/10.5194/acp-17-663-2017>, 2017.
- Thompson, C.R., Wofsy, S.C., Prather, M.J., Newman, P.A., Hanisco, T.F., Ryerson, T.B., Fahey, D.W., Apel, E.C., Brock, C.A., Brune, W.H., Froyd, K., Katich, J.M., Nicely, J.M., Peischl, J., Ray, E., Veres, P.R., Wang, S., Allen, H.M., Asher, E., Bian, H., Blake, D., Bourgeois, I., Budney, J., Bui, T.P., Butler, A., Campuzano-Jost, P., Chang, C., Chin, M., Commane, R., Correa, G., Crounse, J.D., Daube, B., Dibb, J.E., DiGangi, J.P., Diskin, G.S., Dollner, M., Elkins, J.W., Fiore, A.M., Flynn, C.M., Guo, H., Hall, S.R., Hannun, R.A., Hills, A., Hintsä, E.C., Hodzic, A., Hornbrook, R.S., Huey, L.G., Jimenez, J.L., Keeling, R.F., Kim, M.J., Kupc, A., Lacey, F., Lait, L.R., Lamarque, J.-F., Liu, J., McKain, K.,
- 230 Meinardi, S., Miller, D.O., Montzka, S.A., Moore, F.L., Morgan, E.J., Murphy, D.M., Murray, L.T., Nault, B.A., Neuman, J.N., Nguyen, L., Gonzalez, Y., Rollins, A., Rosenlof, K., Sargent, M., Schill, G., Schwarz, J.P., St. Clair, J.M., Steenrod, S.D., Stephens, B.B., Strahan, S.E., Strode, S.A., Sweeney, C., Thames, A.B., Ullmann, K., Wagner, N., Weber, R., Weinzierl, B., Wennberg, P.O., Williamson, C.J., Wolfe, G.M., and Zeng, L.: The NASA Atmospheric Tomography (ATom) Mission Imaging the Chemistry of the Global Atmosphere, *Bulletin of American Meteorological Society*, **E761-790**, <https://doi.org/10.1175/BAMS-D-20-0315.1>, 2022.
- 235 Wang, H., Lu, K., Chen, X., Zhu, Q., Wu, Z., Wu, Y., and Sun, K.: Fast particulate nitrate formation via N<sub>2</sub>O<sub>5</sub> uptake aloft in winter in Beijing, *Atmos. Chem. Phys.*, **18**, 10483–10495, <https://doi.org/10.5194/acp-18-10483-2018>, 2018.
